# Supplementary material for: Machine learning algorithms predicts risk of urinary incontinence after transurethral prostate surgery: a retrospective cohort study
Source: Research Square preprint supplement (doi:10.21203/rs.3.rs-6580455/v1), 2025-05-09
Supplement: Supplementary file 1 [file 2fa7ff5a04f04543bfad00c4.docx]

Table S1 Performance of EUI models in the training set

| Model | AUC | Accuracy | Sensitivity | Specificity | F1-score |
| --- | --- | --- | --- | --- | --- |
| XG Boost | 0.803 (0.766-0.839) | 0.638(0.610-0.666) | 0.837(0.802-0.873) | 0.611(0.574-0.647) | 0.358(0.348-0.368) |
| Light GBM | 0.737 (0.697-0.777) | 0.769(0.747-0.791) | 0.51(0.486-0.534) | 0.805(0.777-0.833) | 0.349(0.332-0.365) |
| RF | 0.782 (0.741-0.822) | 0.751(0.738-0.765) | 0.659(0.638-0.681) | 0.764(0.746-0.781) | 0.389(0.378-0.400) |
| LR | 0.759 (0.717-0.801) | 0.657(0.629-0.686) | 0.725(0.686-0.764) | 0.648(0.610-0.686) | 0.338(0.329-0.347) |
| DT | 0.632 (0.617-0.646) | 0.352(0.349-0.354) | 1.0(1.000-1.000) | 0.263(0.261-0.266) | 0.27(0.269-0.271) |
| SVM | 0.657 (0.605-0.709) | 0.58(0.546-0.615) | 0.69(0.645-0.736) | 0.565(0.520-0.610) | 0.283(0.278-0.289) |
| KNN | 0.823 (0.789-0.857) | 0.604(0.590-0.619) | 0.94(0.915-0.966) | 0.559(0.539-0.578) | 0.363(0.358-0.368) |
| GBDT | 0.794 (0.757-0.830) | 0.662(0.648-0.676) | 0.797(0.778-0.815) | 0.644(0.626-0.661) | 0.361(0.354-0.368) |

***Abbreviation*** LightGBM,light gradient boosting machine; RF,random forest; LR,logistic regression; DT,decision tree; SVM,support vector machine; KNN,k-nearest neighbor; GBDT,gradient boosting decision tree.The results are presented as value (95% CI).

Table S2 Performance of EUI models in the validation set

| Model | AUC | Accuracy | Sensitivity | Specificity | F1-score |
| --- | --- | --- | --- | --- | --- |
| XG Boost | 0.766 (0.656-0.876) | 0.63(0.593-0.667) | 0.755(0.644-0.867) | 0.613(0.568-0.657) | 0.327(0.281-0.374) |
| Light GBM | 0.712 (0.592-0.832) | 0.768(0.745-0.791) | 0.491(0.392-0.590) | 0.806(0.777-0.834) | 0.333(0.277-0.389) |
| RF | 0.756 (0.636-0.875) | 0.737(0.705-0.768) | 0.623(0.492-0.753) | 0.752(0.716-0.787) | 0.359(0.289-0.428) |
| LR | 0.749 (0.627-0.870) | 0.64(0.608-0.61) | 0.691(0.568-0.814) | 0.633(0.595-0.670) | 0.313(0.265-0.361) |
| DT | 0.632 (0.588-0.675) | 0.352(0.331-0.372) | 1.0(1.000-1.000) | 0.263(0.240-0.287) | 0.27(0.263-0.277) |
| SVM | 0.647 (0.488-0.806) | 0.576(0.530-0.621) | 0.658(0.540-0.777) | 0.564(0.504-0.623) | 0.269(0.229-0.310) |
| KNN | 0.662 (0.527-0.796) | 0.548(0.521-0.575) | 0.757(0.649-0.864) | 0.52(0.490-0.549) | 0.285(0.249-0.322) |
| GBDT | 0.767 (0.649-0.886) | 0.653(0.617-0.688) | 0.763(0.668-0.859) | 0.638(0.606-0.670) | 0.348(0.296-0.400) |

***Abbreviation*** LightGBM,light gradient boosting machine; RF,random forest; LR,logistic regression; DT,decision tree; SVM,support vector machine; KNN,k-nearest neighbor; GBDT,gradient boosting decision tree.The results are presented as value (95% CI).

Table S3 Performance of LUI models in the training set

| Model | AUC | Accuracy | Sensitivity | Specificity | F1-score |
| --- | --- | --- | --- | --- | --- |
| XG Boost | 0.950 (0.927-0.973) | 0.852(0.838-0.867) | 0.943(0.923-0.963) | 0.849(0.833-0.865) | 0.308(0.288-0.329) |
| Light GBM | 0.744 (0.675-0.813) | 0.696(0.693-0.699) | 0.795(0.779-0.811) | 0.693(0.689-0.696) | 0.152(0.149-0.156) |
| RF | 0.899 (0.858-0.940) | 0.772(0.747-0.798) | 0.906(0.887-0.925) | 0.768(0.740-0.795) | 0.218(0.201-0.236) |
| LR | 0.870 (0.819-0.921) | 0.723(0.681-0.764) | 0.88(0.834-0.927) | 0.717(0.672-0.762) | 0.185(0.166-0.203) |
| DT | 0.744 (0.675-0.813) | 0.696(0.693-0.699) | 0.795(0.779-0.811) | 0.693(0.689-0.696) | 0.152(0.149-0.156) |
| SVM | 0.928 (0.894-0.962) | 0.789(0.739-0.839) | 0.926(0.877-0.975) | 0.784(0.731-0.837) | 0.255(0.202-0.308) |
| KNN | 0.929 (0.881-0.976) | 0.894(0.890-0.899) | 0.923(0.911-0.935) | 0.893(0.888-0.898) | 0.376(0.366-0.386) |
| GBDT | 0.744 (0.675-0.813) | 0.696(0.693-0.699) | 0.795(0.779-0.811) | 0.693(0.689-0.696) | 0.152(0.149-0.156) |

***Abbreviation*** LightGBM,light gradient boosting machine; RF,random forest; LR,logistic regression; DT,decision tree; SVM,support vector machine; KNN,k-nearest neighbor; GBDT,gradient boosting decision tree.The results are presented as value (95% CI).

Table S4 Performance of LUI models in the validation set

| Model | AUC | Accuracy | Sensitivity | Specificity | F1-score |
| --- | --- | --- | --- | --- | --- |
| XG Boost | 0.892 (0.763-0.996) | 0.840(0.812-0.868) | 0.733(0.556-0.910) | 0.843(0.812-0.874) | 0.242(0.187-0.298) |
| Light GBM | 0.746 (0.589-0.903) | 0.696(0.667-0.725) | 0.8(0.658-0.942) | 0.692(0.664-0.721) | 0.154(0.125-0.184) |
| RF | 0.865 (0.723-0.995) | 0.764(0.717-0.811) | 0.85(0.770-0.930) | 0.761(0.712-0.810) | 0.209(0.174-0.244) |
| LR | 0.825 (0.653-0.982) | 0.713(0.672-0.753) | 0.75(0.571-0.929) | 0.712(0.666-0.757) | 0.151(0.120-0.181) |
| DT | 0.746 (0.589-0.903) | 0.696(0.667-0.725) | 0.8(0.658-0.942) | 0.692(0.664-0.721) | 0.154(0.125-0.184) |
| SVM | 0.829 (0.624-0.993) | 0.774(0.720-0.829) | 0.708(0.558-0.859) | 0.777(0.719-0.835) | 0.203(0.136-0.271) |
| KNN | 0.804 (0.577-0.993) | 0.878(0.851-0.906) | 0.708(0.577-0.840) | 0.884(0.857-0.911) | 0.306(0.227-0.385) |
| GBDT | 0.746 (0.589-0.903) | 0.696(0.667-0.725) | 0.8(0.658-0.942) | 0.692(0.664-0.721) | 0.154(0.125-0.184) |

***Abbreviation*** LightGBM,light gradient boosting machine; RF,random forest; LR,logistic regression; DT,decision tree; SVM,support vector machine; KNN,k-nearest neighbor; GBDT,gradient boosting decision tree.The results are presented as value (95% CI).
